# Supplementary material for: Psychometric evaluation of the Chinese version of Risky Loot Box Index (RLI) and cross-sectional investigation among gamers of China
Source: PeerJ. 2025 Mar 25;13:e19164. doi: 10.7717/peerj.19164 (PMC11952041; doi:10.7717/peerj.19164)
Supplement: Supplemental Information 1 [file peerj-13-19164-s001.xlsx]

## Sheet: online sample
Gender	Age	Education	Monthlyincome	WeeklygamingTime	IGDSFQ1	IGDSFQ2	IGDSFQ3	IGDSFQ4	IGDSFQ5	IGDSFQ6	IGDSFQ7	IGDSFQ8	IGDSFQ9	Monthlylootboxesspent	RLIQ1	RLIQ2	RLIQ3	RLIQ4	RLIQ5	RLIQ6	RLIQ7	RLIQ8	RLIQ9	RLIQ10	RLIQ11	RLIQ12	PGSIQ1	PGSIQ2	PGSIQ3	PGSIQ4	PGSIQ5	PGSIQ6	PGSIQ7	PGSIQ8	PGSIQ9	BarrattQ1	BarrattQ2	BarrattQ3	BarrattQ4	BarrattQ5	BarrattQ6	BarrattQ7	BarrattQ8	GADQ1	GADQ2	GADQ3	GADQ4	GADQ5	GADQ6
1	27	4	5000	14	5	5	5	5	5	5	5	5	5	0	5	5	5	5	5	5	5	5	5	5	5	5	3	3	3	3	3	3	3	3	3	1	4	4	1	1	1	4	4	1	1	1	1	1	1
1	21	4	1200	96	5	3	5	3	1	4	2	5	5	200	5	5	5	4	5	5	4	4	5	5	4	4	2	2	3	3	3	3	2	2	3	1	3	2	1	1	1	3	3	4	3	4	4	3	4
1	22	4	5000	10	5	4	4	5	5	4	4	5	5	10	4	4	5	4	5	4	4	5	5	4	5	5	3	3	2	2	3	3	2	2	2	1	4	3	2	1	2	3	4	4	4	4	3	4	3
1	22	4	5000	24	5	4	5	4	5	4	5	4	5	300	5	4	4	5	4	5	4	4	5	4	5	4	3	2	3	2	3	3	3	2	2	1	1	1	2	2	1	2	2	2	2	3	2	2	2
1	22	4	50000	10	4	4	4	4	4	4	4	4	4	5000	5	5	5	5	5	2	5	5	2	5	5	3	0	0	0	0	0	0	2	0	0	1	4	3	2	1	1	4	4	3	3	2	2	2	2
1	25	4	5000	48	5	4	4	4	5	4	4	4	5	1500	4	4	5	4	4	5	4	4	4	4	5	4	2	2	3	2	2	3	2	2	2	3	2	2	3	3	3	1	2	2	2	2	2	2	2
2	32	4	1000	25	4	2	4	4	3	4	4	3	4	1000	4	4	4	3	4	5	4	5	5	4	4	5	0	1	2	1	1	2	1	1	0	1	3	2	2	2	3	2	3	3	3	2	3	3	2
1	23	3	3000	6	4	4	3	5	4	3	4	4	4	1000	5	4	4	4	5	4	5	4	4	3	4	5	3	2	3	2	3	2	2	3	2	1	3	1	2	1	1	3	4	4	3	4	4	4	3
2	26	4	5000	5	5	4	4	3	4	5	5	4	5	50	4	4	5	4	5	3	4	4	5	4	5	4	2	1	3	2	1	3	2	1	2	2	2	4	2	1	2	2	2	1	2	2	1	2	2
1	23	4	2800	53	5	3	4	5	4	5	5	4	4	1000	5	3	5	4	4	5	4	3	5	4	4	4	3	2	3	2	1	3	2	2	2	1	3	4	2	2	1	3	4	3	4	3	3	3	3
1	29	4	12000	7	4	3	4	5	4	5	4	4	5	1800	5	4	4	4	5	4	4	4	5	4	3	4	2	1	2	3	2	1	2	3	2	1	3	3	1	2	2	4	3	4	3	4	3	4	3
2	29	4	8000	20	4	4	2	1	4	3	1	1	1	1000	5	4	5	4	5	1	3	4	5	4	4	5	3	2	2	1	0	0	0	0	1	1	1	1	2	1	2	1	3	4	3	3	3	1	4
2	25	4	4000	15	4	3	4	5	3	4	4	4	4	500	4	5	4	4	4	5	4	4	3	4	4	4	2	3	2	2	2	2	2	3	2	2	3	4	2	2	1	3	3	3	3	4	3	3	3
1	24	4	11000	40	4	4	4	4	4	1	1	1	1	128	5	1	5	5	1	5	1	5	5	5	5	5	0	3	0	0	1	2	0	3	3	2	2	2	2	2	2	1	1	1	1	3	2	1	2
1	22	4	5000	30	4	5	4	3	4	4	3	4	5	300	4	5	4	3	3	4	5	4	5	4	3	4	2	1	2	1	3	2	1	2	1	2	3	1	2	1	2	1	1	3	4	3	1	3	4
1	20	4	2000	30	5	5	4	5	4	5	3	5	3	300	4	3	5	5	4	2	5	4	5	5	4	2	0	1	3	0	1	2	1	1	2	4	3	4	3	4	4	3	4	2	1	2	3	2	4
1	25	4	6000	24	4	5	5	4	4	5	3	4	3	500	4	5	5	4	3	2	4	5	4	5	4	3	0	1	2	0	1	2	3	2	3	4	4	4	4	4	3	3	4	2	3	2	4	2	3
1	18	4	1400	21	4	3	5	5	4	5	3	5	5	200	5	2	4	5	4	3	5	5	3	4	5	3	1	2	3	3	2	1	1	1	2	3	4	4	4	3	4	4	4	3	2	4	3	2	3
1	25	4	8500	20	1	5	5	1	1	1	1	1	1	580	5	5	5	5	5	1	5	5	1	5	5	1	0	0	0	0	0	0	0	0	0	1	1	1	1	1	1	1	1	1	1	1	1	1	1
1	29	4	13000	15	5	4	3	4	5	4	3	4	4	200	4	3	4	5	4	3	4	5	3	4	5	4	2	3	2	3	1	2	3	2	3	3	3	4	2	2	1	3	3	3	4	3	4	3	4
2	18	3	1509	12	4	3	4	5	3	5	4	3	4	100	5	4	3	4	3	5	4	3	5	5	3	4	3	2	1	2	2	1	0	1	0	2	2	1	2	3	1	2	3	2	1	2	3	1	1
1	28	4	2000	10	4	4	4	4	4	4	4	4	2	1000	4	4	4	4	4	4	4	4	4	4	4	4	0	0	0	0	0	0	0	0	0	2	3	3	2	2	2	3	3	3	3	3	3	3	3
1	25	3	5000	48	5	4	4	4	4	4	5	4	4	1000	4	4	5	4	4	5	4	4	1	4	4	4	2	2	3	2	3	2	2	2	2	3	2	2	3	3	3	2	2	2	2	2	2	2	2
1	23	4	73676	39	4	4	3	4	5	4	3	3	4	3664	4	4	3	4	5	4	4	3	5	4	3	4	3	2	2	1	3	2	2	2	2	1	3	3	3	1	2	3	3	4	3	3	2	4	3
1	24	4	6000	30	4	3	4	3	4	3	4	4	4	1000	4	4	4	5	4	3	4	4	4	4	4	3	2	2	3	2	2	1	2	1	2	2	1	1	2	2	3	1	2	3	2	3	2	3	2
1	22	4	31688	19	4	5	4	3	4	4	3	5	4	3694	5	4	4	3	5	4	3	4	5	4	3	3	3	2	2	1	3	2	2	1	3	1	3	3	3	1	1	3	2	4	3	3	2	4	3
1	18	3	1500	15	5	4	3	4	4	3	3	4	5	200	5	4	3	4	4	5	4	3	4	4	5	2	2	1	0	0	0	1	0	0	1	2	2	1	1	2	1	2	3	1	2	1	3	2	1
1	20	4	5000	10	4	2	5	3	1	4	2	1	1	150	4	3	4	4	5	4	3	4	4	3	4	5	0	1	2	1	2	3	2	2	1	1	2	1	1	1	2	1	1	2	1	2	1	2	1
1	22	4	1000	10	4	3	4	3	3	4	3	4	3	100	4	5	4	5	4	4	5	4	3	4	4	1	0	1	0	0	0	0	1	0	0	2	2	3	1	1	2	3	4	2	1	2	2	1	2
1	22	4	5000	40	4	3	4	5	3	4	5	3	4	1008	4	3	4	5	3	4	5	3	4	5	2	4	2	1	2	3	2	1	2	3	1	2	2	3	1	2	3	3	4	3	2	3	4	3	2
1	33	4	8000	15	4	1	3	1	1	1	2	1	1	1500	5	4	5	2	5	4	1	4	5	4	4	3	1	1	3	0	2	0	0	0	2	1	2	2	2	2	1	2	2	2	1	2	2	1	1
1	18	4	1200	14	5	4	3	4	3	2	4	5	4	200	5	4	3	4	5	4	3	4	5	4	3	2	1	0	0	2	1	0	1	0	1	2	2	1	2	3	1	2	2	3	2	1	2	1	1
1	33	2	1700	50	3	4	4	4	4	3	4	4	3	500	3	4	3	4	4	4	4	4	4	3	4	4	2	3	2	2	2	2	2	2	2	2	4	3	2	1	1	3	3	3	4	3	3	3	3
1	24	3	5000	40	5	4	5	5	4	4	4	4	4	1000	5	4	4	5	4	5	4	4	1	4	4	1	0	2	2	2	2	3	2	2	2	2	2	2	3	2	2	2	2	3	2	2	2	2	2
1	22	4	5000	24	4	3	4	5	4	3	4	4	4	0	4	3	4	3	4	3	4	5	4	3	4	4	2	1	1	1	1	0	0	0	0	2	2	3	2	2	3	3	3	3	4	4	4	3	3
2	25	4	20000	20	4	2	4	4	4	4	2	4	4	1500	4	4	4	4	4	4	4	4	4	4	4	1	0	1	1	1	0	0	1	0	0	1	1	2	2	2	1	1	4	2	2	2	2	2	2
1	20	4	6000	20	4	3	3	5	5	4	4	3	2	400	3	5	3	4	4	3	3	5	5	4	4	2	2	1	1	0	1	2	2	1	1	2	4	2	3	2	1	2	2	3	3	2	4	2	2
1	26	4	2400	60	4	3	4	3	3	3	4	3	4	500	4	4	4	3	4	3	4	3	4	4	4	3	2	2	1	2	2	1	2	2	2	2	2	3	2	2	2	3	2	2	3	2	3	2	2
1	28	5	10000	60	5	5	5	5	5	5	5	5	1	0	5	5	5	5	5	1	5	5	1	1	1	5	0	0	0	0	0	0	0	0	3	4	4	4	4	4	4	4	4	1	1	1	1	1	4
1	26	4	6000	20	1	2	4	4	2	4	2	4	4	6000	4	4	3	4	5	1	4	4	5	4	2	4	2	2	2	1	2	2	2	1	1	1	3	3	3	1	2	2	3	3	3	2	2	3	2
1	24	4	6000	18	4	1	4	3	2	3	2	3	2	300	3	4	4	3	4	3	4	4	4	3	4	4	0	0	0	0	0	0	0	0	0	2	1	1	3	2	3	1	1	1	1	1	1	1	1
1	23	3	1200	12	4	3	4	4	3	5	3	4	3	120	4	5	4	4	5	4	3	4	2	3	4	2	1	0	1	0	0	0	1	0	0	1	2	3	1	1	1	2	3	2	1	2	1	1	2
2	26	5	3000	10	5	4	3	4	1	5	1	1	2	500	5	4	3	4	5	3	3	4	4	3	4	2	1	2	0	1	2	2	3	1	1	1	1	1	1	1	1	1	3	3	1	3	2	1	2
2	35	4	6000	35	5	4	4	3	4	3	3	4	4	2000	4	3	4	3	4	3	3	4	4	3	4	4	2	2	2	1	2	2	2	1	2	2	2	3	2	2	3	3	3	3	2	3	3	3	2
1	29	4	8000	14	3	3	4	2	2	2	4	4	2	2000	4	4	4	4	3	2	4	4	4	4	4	2	1	1	1	1	2	2	3	1	2	2	1	2	4	3	3	2	3	2	2	2	3	3	3
1	28	4	4000	10	5	4	3	4	3	3	3	3	4	1000	4	3	4	3	4	3	4	4	3	4	3	4	2	1	2	2	1	2	2	2	2	2	2	3	3	1	2	3	3	3	2	3	3	2	3
1	23	4	5000	10	4	3	4	4	4	3	3	3	4	500	4	3	4	3	4	4	3	4	3	4	3	4	2	2	2	3	2	1	2	2	2	2	2	3	2	2	3	3	3	3	2	3	2	3	3
1	30	4	4000	10	3	1	2	2	2	3	3	2	1	98	4	2	4	2	4	5	4	4	3	3	3	5	0	1	0	0	0	0	1	0	0	1	2	2	2	1	2	2	2	2	1	2	1	1	1
1	29	4	8000	30	5	4	5	4	5	4	5	3	5	2000	5	2	5	2	5	2	5	2	5	2	3	4	3	2	3	1	3	1	3	1	2	1	3	4	2	1	2	4	2	3	3	4	3	3	4
1	30	4	30000	20	4	5	4	5	4	5	4	5	4	20000	3	4	3	4	3	3	4	4	3	4	3	4	3	1	3	1	3	2	3	2	3	2	2	3	3	1	2	3	4	2	3	4	4	2	4
1	22	4	2200	10	3	2	4	3	4	3	4	3	4	20	4	3	4	3	4	4	4	5	4	3	1	3	2	1	2	3	2	3	2	1	3	2	1	2	1	1	2	1	3	3	4	3	4	4	2
2	22	4	750	30	4	3	4	3	4	3	2	4	2	300	4	3	4	3	2	3	2	4	4	4	4	4	1	2	1	1	2	2	2	1	2	2	3	3	3	2	3	3	2	3	3	2	3	3	2
2	30	4	80000	30	5	3	3	4	4	3	4	3	4	8000	3	4	3	4	3	4	3	3	4	3	4	3	2	2	3	2	2	3	1	2	2	1	2	4	3	1	3	3	3	2	3	4	2	3	3
1	24	3	2000	30	3	3	4	3	4	3	4	3	3	150	3	4	3	4	4	3	4	3	3	3	3	4	2	1	2	1	2	1	2	2	2	2	3	2	2	2	2	3	2	3	2	3	2	3	3
2	29	4	6500	7	3	4	3	4	3	4	3	3	3	600	4	3	4	3	4	3	4	3	4	3	4	2	2	1	2	1	2	1	2	1	2	2	2	3	2	1	2	3	2	3	2	3	2	2	2
2	29	4	6000	6	4	4	3	4	3	4	3	4	3	600	3	4	3	4	3	4	3	4	3	4	3	3	2	1	2	1	2	1	2	1	2	2	2	2	2	2	2	2	2	2	3	2	2	3	2
2	24	4	4500	40	5	3	4	4	1	2	1	5	2	100	5	4	3	3	4	2	4	3	1	4	5	2	1	0	0	0	1	1	2	0	3	1	1	1	2	1	2	1	1	2	1	2	1	2	2
1	26	4	5000	25	4	2	3	3	2	2	2	2	2	648	4	4	4	4	4	3	2	3	3	3	3	3	0	0	0	0	0	0	0	0	0	1	1	2	1	1	1	2	2	1	1	1	1	1	1
1	22	4	10000	20	2	1	1	1	1	1	1	2	1	100	4	2	3	5	1	1	3	5	3	5	5	3	0	0	0	0	0	0	0	0	0	2	2	2	1	1	1	2	4	4	4	4	4	2	3
1	22	4	1500	20	4	3	5	3	3	3	2	2	2	200	4	3	4	4	3	2	3	4	3	4	4	2	1	1	2	0	1	1	1	0	1	2	2	2	2	2	2	1	2	2	2	1	2	2	1
1	26	5	1200	10	3	3	2	3	3	3	3	3	3	0	4	3	4	3	3	5	3	3	3	3	3	3	0	0	1	1	1	2	1	1	2	3	2	3	2	3	2	2	3	2	2	2	2	2	2
2	24	5	10000	10	3	2	2	3	2	2	1	4	1	0	3	5	4	3	2	2	3	4	3	4	4	3	0	0	1	0	0	0	0	0	0	1	2	2	1	1	1	2	2	2	2	2	2	2	2
2	28	4	4900	7	4	4	3	2	4	4	3	4	3	550	3	4	3	4	4	3	4	3	3	2	3	4	1	2	1	2	2	1	2	1	2	1	2	2	4	1	3	1	2	3	2	2	2	1	3
2	27	4	5900	6	3	4	3	4	3	4	3	4	3	500	3	4	3	4	3	4	3	2	4	3	3	4	2	2	1	2	1	2	2	1	2	3	3	3	3	2	3	3	2	3	2	3	2	3	3
2	29	4	6500	6	4	4	3	3	3	4	3	2	3	600	3	4	3	4	3	4	3	4	4	3	3	2	2	1	2	1	2	2	1	2	1	2	2	2	1	2	2	3	2	3	2	3	2	2	2
1	23	4	6000	12	4	3	2	3	3	3	1	5	2	60	4	3	4	3	4	3	2	4	4	3	4	1	2	1	2	1	2	2	1	2	2	2	2	3	3	2	3	2	2	3	2	3	2	3	3
1	26	4	3000	10	3	2	4	3	2	2	3	2	1	200	4	3	3	4	4	3	2	4	2	3	4	3	0	0	0	0	0	0	0	0	0	2	1	2	2	2	2	1	1	2	2	2	2	1	2
1	22	2	4000	4	5	2	4	3	2	4	2	3	2	500	4	4	3	4	4	2	2	4	3	3	4	2	0	0	0	0	0	0	2	0	0	1	2	3	2	1	1	2	3	2	2	2	2	2	2
1	26	2	5000	35	4	3	4	1	1	1	1	3	1	300	4	3	4	2	4	3	4	2	3	2	4	3	1	2	1	0	1	1	0	2	1	3	2	3	1	2	3	3	2	3	2	3	2	1	3
2	29	4	6800	6	4	3	4	3	3	4	3	4	3	500	4	3	4	3	3	4	3	3	2	3	3	3	1	2	1	2	1	2	1	2	2	3	3	2	2	3	2	2	3	3	2	3	2	2	2
1	36	4	8000	12	3	2	2	1	1	1	3	1	1	500	4	4	5	2	4	3	1	4	3	2	4	1	1	2	3	0	1	1	0	0	1	1	1	1	2	2	1	1	2	2	1	2	2	1	1
1	22	3	5000	10	3	2	3	2	3	2	2	2	2	100	3	4	3	3	3	3	4	3	3	2	3	3	0	0	1	0	0	0	1	0	1	3	2	2	2	2	3	2	2	2	1	2	1	1	2
2	26	4	5000	6	2	1	2	1	2	1	1	1	1	100	4	3	3	3	3	4	3	4	2	2	3	3	0	0	0	0	0	0	0	0	0	1	2	2	2	2	3	2	3	2	1	1	2	2	1
1	25	5	3000	5	3	1	1	1	1	1	1	1	1	50	5	3	4	2	3	1	4	5	1	4	4	1	0	0	0	0	0	0	0	0	0	1	1	1	1	2	2	1	2	1	1	1	1	1	1
2	28	3	10000	20	5	3	4	3	3	3	2	4	2	200	3	3	3	3	3	3	3	3	3	3	3	3	1	1	1	1	1	1	1	1	1	1	2	3	2	2	2	2	4	2	2	2	2	2	3
1	25	5	6000	12	2	3	3	3	3	4	4	4	4	200	4	4	4	5	5	5	4	1	1	1	1	1	2	2	3	3	3	3	1	0	3	2	3	4	3	3	2	2	3	4	4	4	4	4	4
1	19	4	2000	10	4	2	3	3	2	2	2	3	2	100	4	2	2	2	4	2	2	4	2	4	4	4	0	0	1	1	1	0	0	1	0	1	2	2	2	2	2	2	3	3	2	2	2	2	2
1	19	4	2500	10	5	5	5	5	3	1	2	3	1	200	3	3	3	3	3	3	3	3	3	3	3	3	1	1	1	1	1	1	1	1	1	3	2	2	3	3	3	2	2	2	2	2	2	2	2
1	18	4	3000	7	3	3	3	3	3	3	3	3	3	100	3	3	3	3	3	3	3	3	3	3	3	3	0	0	0	0	0	0	0	0	0	2	2	2	3	3	3	1	1	2	2	2	2	2	2
1	27	3	4000	4	3	2	3	3	2	2	2	2	2	100	3	3	3	3	3	3	3	3	3	3	3	3	0	0	0	0	2	2	2	2	2	3	2	3	2	2	2	2	3	2	2	2	2	2	2
1	21	4	5000	3	3	1	1	3	1	2	1	2	1	30	3	3	3	3	3	3	3	3	3	3	3	3	1	0	0	0	0	0	1	0	0	3	3	2	3	3	3	2	2	1	1	1	2	1	1
1	28	4	16000	20	3	2	3	3	3	3	1	3	1	50	3	3	3	3	3	3	3	3	1	3	3	3	0	0	0	0	0	0	0	0	0	3	2	2	3	3	3	2	2	2	2	1	1	2	1
1	57	1	5000	40	4	3	3	3	3	3	3	3	3	10	1	2	2	2	3	3	3	3	3	3	3	3	2	2	2	2	2	2	2	2	2	2	3	3	2	2	2	3	3	3	3	3	3	2	2
1	27	3	7000	25	2	1	1	2	2	2	3	2	1	200	1	1	1	3	2	3	3	5	3	3	3	3	0	0	1	1	1	1	1	0	1	2	3	4	3	4	3	3	3	2	2	2	3	2	2
1	23	5	2000	8	5	3	3	3	4	4	4	4	3	50	5	1	2	2	1	3	2	4	2	3	3	3	0	0	1	0	0	1	0	0	1	1	1	2	1	1	1	2	2	2	2	2	2	2	2
1	25	5	5000	20	3	3	4	3	2	2	3	4	2	0	4	2	2	2	2	2	2	3	2	3	4	2	0	0	0	0	0	0	0	0	0	1	2	2	2	2	2	1	3	4	4	3	3	4	4
1	27	4	5000	20	5	5	5	5	2	2	5	2	5	200	4	4	2	4	4	2	1	2	1	1	1	4	0	0	0	0	0	0	0	0	0	2	2	2	2	2	3	3	2	1	1	2	1	1	1
2	26	3	6000	15	2	1	3	1	1	1	1	1	1	100	2	3	2	3	3	4	2	4	1	2	2	2	0	0	0	0	0	0	0	0	0	2	2	2	2	2	2	2	2	1	1	1	1	1	1
1	24	4	3000	15	2	4	1	1	2	1	5	5	3	0	4	5	2	1	4	5	1	4	1	1	1	1	0	0	0	0	0	0	0	0	0	1	1	4	4	3	1	1	1	4	3	4	4	3	4
1	24	5	800	10	3	3	3	2	3	2	2	2	2	0	2	2	2	3	2	3	3	2	2	3	3	3	1	1	2	2	1	2	1	2	2	3	2	3	2	3	3	3	2	2	2	2	3	2	3
2	20	4	4000	2	5	4	4	5	2	1	2	2	4	200	3	2	4	3	3	2	2	4	1	2	2	2	1	0	0	1	0	1	0	0	1	1	1	1	2	1	2	1	2	2	1	2	1	2	1
1	25	5	3000	1	2	2	2	2	2	2	2	2	2	0	4	2	2	1	5	3	3	2	1	1	3	3	0	1	0	1	0	0	0	0	0	2	2	3	2	2	2	2	2	2	1	2	1	1	2
1	25	4	3000	28	3	2	4	3	3	2	2	2	1	0	2	3	3	2	3	2	3	2	2	2	3	2	1	1	0	0	1	1	1	0	1	3	2	3	2	2	2	2	2	2	2	3	2	2	2
1	27	6	10000	10	3	1	1	1	1	1	1	3	1	500	4	1	2	1	1	1	4	3	2	4	4	2	0	0	0	0	0	0	0	0	0	1	2	4	1	1	1	2	3	2	1	1	1	1	2
1	25	5	2000	5	4	1	4	2	4	3	4	5	2	0	5	4	4	4	1	1	1	5	1	1	1	1	0	0	0	0	0	0	0	0	0	2	1	2	2	2	1	2	2	2	2	2	2	2	2
2	26	5	8000	3	2	2	2	2	2	2	2	2	2	0	3	3	3	2	2	3	3	3	1	2	2	2	0	0	0	0	0	0	0	0	0	2	1	2	2	2	2	2	2	1	1	1	1	1	1
1	27	4	8000	20	3	4	3	3	2	2	3	4	3	100	2	2	2	2	4	3	1	4	2	2	2	2	0	0	1	1	0	0	0	0	1	3	3	3	3	3	3	3	2	2	1	2	2	2	2
1	24	5	3500	6	2	1	1	1	1	1	1	1	1	200	4	2	1	1	5	1	1	5	1	1	4	2	0	2	0	0	0	0	0	0	0	1	1	1	1	1	1	1	3	1	1	1	1	1	1
1	22	4	1500	5	3	2	2	3	2	2	2	3	2	0	2	3	2	2	3	3	2	3	2	2	2	2	0	1	1	0	1	1	0	0	1	2	2	2	3	3	2	2	2	2	2	2	2	2	2
2	23	4	5000	5	5	3	2	2	2	2	2	3	2	500	3	1	3	2	4	2	2	4	1	2	2	2	0	0	1	0	0	0	0	0	0	1	1	1	2	1	2	1	2	1	1	1	2	1	2
1	26	4	5000	3	2	2	2	1	2	1	3	2	2	10	3	2	3	2	2	2	2	3	2	3	2	2	0	0	0	0	0	0	0	0	0	1	2	2	2	2	2	2	2	2	2	2	2	1	2
1	24	5	4000	12	3	1	1	1	1	1	1	2	1	0	1	2	2	4	2	4	1	2	2	2	2	3	0	0	0	0	1	0	0	0	0	1	2	2	2	2	1	1	2	1	2	2	2	1	1
1	44	2	8000	2	4	3	2	3	4	3	2	4	2	200	2	3	2	3	2	3	3	2	1	2	3	1	0	1	1	0	1	1	1	0	1	3	3	3	2	3	2	2	3	2	2	3	2	1	2
2	30	3	4000	20	2	1	1	2	1	2	1	2	1	50	2	3	2	3	3	2	2	4	1	1	1	2	0	0	0	0	0	0	0	0	1	1	2	2	1	1	1	1	2	1	1	2	1	1	2
1	27	3	5000	14	3	1	2	2	2	1	1	4	2	0	3	2	2	2	1	5	2	1	1	1	1	5	0	0	0	0	0	3	0	0	3	3	3	4	4	3	3	3	2	3	2	2	2	2	2
2	22	4	6000	10	4	1	1	1	1	1	1	1	1	30	4	4	3	4	4	1	1	1	1	1	1	1	0	0	0	0	0	0	0	0	0	1	1	1	1	1	1	1	1	1	1	1	1	1	1
1	23	3	5000	21	2	1	2	2	2	2	2	2	2	50	3	2	2	2	2	2	2	2	2	2	2	2	0	0	0	0	0	0	0	0	0	3	2	2	3	3	3	2	2	2	2	2	1	1	2
1	25	5	4000	15	4	2	3	2	2	2	2	3	1	0	1	1	3	1	4	3	2	3	1	2	3	1	0	0	0	0	0	0	0	0	0	1	2	3	2	2	2	2	2	2	1	2	2	2	2
2	23	6	3000	5	2	1	2	2	1	1	1	1	1	150	3	3	2	2	3	1	1	2	2	2	2	2	0	0	0	0	0	1	2	1	0	1	1	1	1	1	1	1	2	2	1	2	1	1	1
1	20	3	2000	53	3	1	1	1	1	1	1	1	1	0	1	5	5	1	1	1	1	1	5	1	1	1	0	0	2	0	0	0	3	0	0	1	1	1	1	1	2	3	2	1	1	1	1	1	1
1	29	2	4000	40	2	1	3	2	1	1	1	4	1	100	3	3	3	3	4	1	1	2	1	1	1	1	0	0	0	0	0	0	0	0	0	3	1	2	1	1	1	1	2	1	1	2	1	1	1
2	32	3	2000	8	2	2	3	2	2	2	1	3	2	10	3	3	2	2	2	2	3	2	1	1	2	1	0	0	0	0	1	1	0	0	0	2	2	3	1	2	2	3	2	3	2	2	3	2	2
1	24	3	2500	8	3	1	4	1	3	3	1	4	1	20	2	4	3	1	4	2	1	1	3	1	1	1	0	0	0	0	0	0	0	0	0	2	2	1	1	2	3	1	1	2	2	2	3	2	1
1	22	4	6800	6	3	1	2	1	2	1	1	3	1	68	3	1	1	2	2	4	1	4	1	1	1	2	0	0	0	0	0	0	0	0	0	1	2	2	2	1	2	1	4	1	1	2	2	1	2
2	24	5	3000	5	3	1	2	3	1	1	1	3	1	0	2	1	2	3	4	2	2	3	1	1	1	1	0	0	1	0	0	0	0	0	0	1	2	2	2	2	2	1	2	2	1	1	2	1	2
1	28	4	7000	24	4	1	2	1	1	1	1	3	1	10	2	2	1	2	3	2	1	1	1	3	1	3	0	0	0	0	0	0	0	0	0	2	2	2	2	2	2	3	4	2	1	2	1	1	1
1	25	4	8000	20	5	5	2	1	4	3	1	3	4	0	3	2	2	3	2	2	1	3	1	1	1	1	0	0	0	0	0	0	0	0	0	3	3	1	4	1	3	2	4	4	4	4	4	2	2
1	25	5	2000	28	5	3	5	2	3	2	3	2	1	100	1	1	2	2	1	2	1	3	2	2	2	2	0	0	0	0	0	0	0	0	0	2	2	4	2	3	3	2	2	1	1	1	2	1	2
2	21	4	4000	15	3	1	2	1	1	1	1	1	1	0	2	2	1	2	2	2	2	3	1	1	2	1	0	0	0	0	0	0	0	0	0	1	1	2	1	1	1	2	1	1	1	1	2	1	1
1	26	5	2000	10	3	2	1	3	3	2	2	4	3	20	1	1	1	1	3	5	1	2	1	2	2	1	0	0	1	0	0	0	0	0	0	2	1	2	2	2	3	1	2	2	1	1	1	1	2
2	26	5	5000	3	2	1	2	3	2	1	1	3	1	6	3	1	1	1	1	1	1	3	1	3	4	1	0	0	1	0	0	0	0	0	0	3	3	3	3	3	3	2	3	2	1	1	2	1	2
1	25	2	8000	48	3	4	3	3	2	1	1	1	1	200	2	2	2	3	4	1	1	1	1	1	1	1	0	0	0	0	0	0	0	0	0	3	1	1	1	2	2	1	1	1	1	1	1	1	1
1	22	3	4000	6	1	2	1	2	1	2	2	1	1	50	1	2	2	2	2	1	2	1	2	2	1	2	0	0	0	0	0	0	1	0	0	3	2	2	3	3	3	2	3	1	1	2	1	1	1
1	22	4	3900	5	1	2	2	2	1	1	2	1	1	30	1	2	2	2	2	2	2	1	2	1	1	2	0	0	0	0	0	0	0	1	1	3	2	2	3	3	2	2	3	1	2	2	1	1	1
1	26	5	2500	28	5	2	1	1	1	5	1	3	1	0	1	3	1	3	1	4	1	1	1	1	1	1	0	0	0	0	0	0	0	0	0	3	2	3	3	3	1	2	2	2	2	2	2	2	2
1	20	3	1000	20	3	2	2	1	1	3	1	4	1	10	2	1	2	1	2	1	1	2	2	1	2	1	1	0	1	1	0	1	0	1	0	2	1	2	4	1	2	1	2	1	2	1	1	2	1
1	27	4	5000	18	5	2	3	3	2	1	1	3	3	0	3	1	1	1	1	5	1	1	1	1	1	1	0	0	0	0	0	0	0	0	0	2	2	3	2	2	2	3	2	2	1	1	2	1	1
1	20	4	2000	13	1	2	4	1	1	2	2	4	2	0	1	1	2	2	1	2	2	1	1	2	2	1	1	0	1	1	1	0	0	0	0	1	2	2	4	1	2	1	1	1	2	2	1	1	3
1	26	4	8000	8	3	1	2	1	1	1	1	3	2	0	1	1	2	1	1	3	1	4	1	1	1	1	0	0	1	0	0	0	0	0	0	2	2	2	3	3	2	2	3	2	2	3	2	1	1
1	27	4	1000	20	3	2	2	2	2	1	1	3	1	0	2	3	1	1	1	1	1	3	1	1	1	1	0	0	0	0	0	0	0	0	0	1	1	2	2	1	2	1	1	2	1	2	1	1	1
1	25	4	2500	8	4	1	3	2	1	2	1	2	2	50	3	1	2	2	1	1	2	1	1	1	1	1	0	0	0	0	0	0	0	0	0	1	2	2	1	1	1	2	2	2	1	1	1	1	2
2	25	5	3000	2	2	1	1	1	1	1	1	2	1	6	2	2	2	2	1	2	1	1	1	1	1	1	0	0	0	0	0	0	0	0	0	1	2	2	1	2	2	2	2	1	1	1	1	1	1
2	25	4	2500	10	3	1	1	1	2	1	2	1	1	0	2	2	2	1	1	1	1	1	1	1	1	1	0	0	0	0	0	0	0	0	0	2	2	2	2	1	1	1	3	2	2	2	2	2	2
1	27	5	4000	10	4	4	3	1	1	2	2	4	1	0	3	1	2	1	1	1	1	1	1	1	1	1	0	0	1	0	0	0	0	0	0	1	1	2	2	3	2	1	2	2	1	2	1	2	1
2	25	4	4000	1	2	1	1	2	1	1	1	3	1	0	1	1	1	1	1	4	1	1	1	1	1	1	0	0	0	0	0	0	0	0	0	1	2	2	1	2	2	2	2	2	2	2	2	1	2
1	26	5	8000	7	1	1	1	1	1	1	1	1	1	50	1	1	1	1	1	1	1	3	1	1	1	1	0	0	0	0	0	0	0	0	0	1	1	1	2	2	2	2	4	1	1	1	1	1	1
1	27	5	5000	30	5	5	5	5	3	2	1	2	1	0	1	1	1	1	1	1	1	1	1	1	1	1	0	0	0	0	0	0	0	0	0	1	2	2	1	1	1	1	3	1	1	1	2	1	1
1	27	3	10000	20	1	1	1	1	1	1	1	1	1	0	1	1	1	1	1	1	1	1	1	1	1	1	0	0	0	0	0	0	0	0	0	3	2	2	3	3	3	2	2	2	2	2	2	2	2
1	30	4	5000	20	5	1	2	1	1	1	1	1	1	200	1	1	1	1	1	1	1	1	1	1	1	1	0	0	0	0	0	0	0	0	0	2	3	3	2	2	2	3	3	1	1	1	1	1	1
1	30	4	12000	10	4	1	4	4	4	4	4	4	3	0	1	1	1	1	1	1	1	1	1	1	1	1	0	0	0	0	0	0	0	0	0	3	4	4	3	3	2	3	4	3	3	2	2	2	2
1	21	4	5000	8	1	1	1	1	1	1	1	1	1	0	1	1	1	1	1	1	1	1	1	1	1	1	0	0	0	0	0	0	0	0	0	1	1	1	1	1	1	1	1	1	1	1	1	1	1
1	27	5	6000	5	2	1	1	2	1	2	1	3	1	0	1	1	1	1	1	1	1	1	1	1	1	1	0	0	0	0	0	0	0	0	0	1	1	1	1	1	1	1	2	2	1	1	2	1	2
1	26	5	2000	3	3	2	3	2	2	2	2	2	2	0	1	1	1	1	1	1	1	1	1	1	1	1	0	0	0	0	0	0	0	0	0	1	2	1	1	1	1	1	2	1	1	1	1	1	1
[truncated: 10 more columns]
