# Supplementary material for: Psychometric evaluation of the Chinese version of Risky Loot Box Index (RLI) and cross-sectional investigation among gamers of China
Source: PeerJ. 2025 Mar 25;13:e19164. doi: 10.7717/peerj.19164 (PMC11952041; doi:10.7717/peerj.19164)
Supplement: Supplemental Information 2 [file peerj-13-19164-s002.xlsx]

## Sheet: offline sample
Gender	Age	Education	Monthlyincome	WeeklygamingTime	IGDSFQ1	IGDSFQ2	IGDSFQ3	IGDSFQ4	IGDSFQ5	IGDSFQ6	IGDSFQ7	IGDSFQ8	IGDSFQ9	Monthlylootboxesspent	RLIQ1	RLIQ2	RLIQ3	RLIQ4	RLIQ5	RLIQ6	RLIQ7	RLIQ8	RLIQ9	PGSIQ1	PGSIQ2	PGSIQ3	PGSIQ4	PGSIQ5	PGSIQ6	PGSIQ7	PGSIQ8	PGSIQ9	BBISQ1	BBISQ2	BBISQ3	BBISQ4	BBISQ5	BBISQ6	BBISQ7	BBISQ8	GADQ1	GADQ2	GADQ3	GADQ4	GADQ5	GADQ6	GADQ7	PHQ9Q1	PHQ9Q2
1	22	4	2000	30	5	4	5	4	1	2	1	1	2	6000	5	4	5	4	5	5	4	5	4	3	2	3	2	3	2	2	2	2	1	1	1	1	1	1	3	3	0	0	0	0	0	0	0	0	0
1	24	4	15000	20	4	4	5	4	4	4	2	2	2	5000	4	3	3	4	3	3	4	3	3	2	2	2	1	1	2	2	2	2	2	3	2	3	2	2	3	3	2	3	2	2	2	2	2	1	1
1	26	4	9000	25	4	4	5	4	3	4	4	4	5	3000	4	4	5	5	4	5	4	4	4	2	2	3	2	2	2	3	3	2	2	3	4	2	2	2	4	4	2	2	3	3	2	2	3	2	2
1	21	3	6000	25	5	2	5	2	5	5	3	3	4	3000	5	5	3	5	4	5	5	3	5	1	3	2	2	3	2	1	3	3	1	1	1	3	1	2	1	2	1	2	2	0	1	2	2	0	0
2	27	4	5000	60	5	4	3	5	4	4	3	5	4	3000	5	4	3	5	5	3	4	5	4	2	1	3	2	1	2	2	1	2	4	2	3	3	4	2	4	3	2	3	2	1	2	3	2	2	3
1	31	4	10110	20	4	3	4	4	5	4	5	4	3	2500	4	3	5	4	3	3	5	4	4	2	2	1	2	2	1	1	2	1	2	2	3	2	2	2	2	3	2	1	2	1	2	1	1	2	1
1	28	4	5800	30	4	3	3	4	4	5	4	3	4	2458	4	3	4	5	4	3	5	4	4	2	1	1	2	3	2	1	2	2	2	2	2	2	3	3	3	2	2	1	2	3	2	1	2	2	1
2	28	4	7000	20	4	3	4	5	4	4	4	5	4	2100	4	3	3	4	3	3	4	4	2	2	1	2	2	2	2	2	3	2	2	3	3	2	2	3	3	3	1	2	1	1	2	1	2	2	1
1	28	4	3000	12	5	4	3	4	4	3	4	3	4	2000	5	3	4	5	3	3	3	4	4	1	2	2	2	3	3	2	3	3	1	3	2	2	2	3	2	3	2	2	1	1	1	2	2	1	1
1	35	4	8000	15	4	3	4	3	4	5	4	4	2	2000	4	3	4	5	4	5	4	4	5	1	1	2	1	2	1	0	1	2	2	2	2	2	1	2	2	1	1	1	1	0	1	0	0	1	0
1	24	4	12000	28	4	4	4	4	5	4	4	5	4	2000	4	4	5	4	4	4	5	4	3	3	2	2	3	3	3	2	2	3	2	1	2	1	2	2	4	3	2	2	2	3	3	2	3	2	3
1	24	4	3000	60	5	4	4	5	5	4	5	4	4	2000	2	2	1	2	2	4	5	4	5	2	2	1	3	2	1	3	2	2	3	1	1	3	3	4	2	3	2	3	2	2	3	2	3	2	3
1	23	4	8000	10	4	3	4	5	4	3	4	4	3	2000	4	5	4	3	4	4	3	5	4	2	1	2	2	3	2	2	2	2	1	3	4	2	2	1	3	3	2	1	2	3	2	1	2	3	2
1	28	4	7000	20	4	3	5	4	3	3	3	4	4	2000	5	4	5	5	4	4	5	3	4	1	2	2	2	2	2	1	1	1	2	3	2	3	3	2	3	4	1	1	2	1	1	1	1	1	1
1	28	4	20000	12	4	2	1	2	2	1	5	5	3	2000	3	2	4	3	4	3	4	3	5	1	2	1	1	1	2	1	2	2	3	3	2	2	3	2	2	2	1	1	2	1	1	2	1	1	2
1	20	3	8000	20	4	4	3	4	3	2	1	3	1	2000	3	4	3	3	4	2	4	4	4	1	1	1	2	2	1	1	2	1	1	3	3	2	3	2	3	3	1	1	2	2	2	2	2	2	2
1	20	3	5000	80	4	4	4	3	3	3	3	3	3	2000	4	4	4	4	4	4	4	3	3	1	1	1	1	1	1	1	1	1	2	2	3	3	2	2	2	2	2	2	2	2	1	1	1	1	1
2	26	4	8000	24	5	1	5	5	1	5	5	1	5	1800	5	5	5	1	5	1	5	5	4	3	2	3	3	3	2	3	2	3	1	1	1	1	1	1	1	1	0	0	1	0	1	0	0	0	1
1	28	3	6000	10	3	4	3	4	3	3	4	3	4	1500	4	3	3	4	3	3	4	4	3	2	1	2	2	1	2	1	2	2	2	2	3	2	2	3	2	3	2	1	2	2	2	1	2	2	1
1	36	4	1000	3	5	4	5	4	3	2	2	4	2	1500	5	2	4	4	2	2	4	2	2	1	0	0	0	0	0	0	0	0	2	2	2	3	3	3	3	2	1	1	1	1	1	0	1	1	1
1	35	2	8000	12	5	4	5	1	1	2	1	1	1	1500	5	4	5	5	4	4	5	5	5	2	3	2	2	3	2	2	3	2	1	1	1	1	1	2	1	3	0	1	2	0	0	0	1	0	0
1	24	4	4000	30	4	4	4	3	4	4	3	4	3	1500	4	4	5	4	4	4	4	2	4	2	3	2	1	2	3	2	3	2	1	2	2	1	1	1	2	4	1	1	1	1	1	1	1	1	1
1	23	4	2000	40	5	4	5	4	5	5	4	5	4	1500	5	4	3	5	4	4	5	4	4	2	3	2	2	1	2	2	3	2	4	4	3	4	4	4	4	3	2	3	2	3	2	3	2	2	3
2	23	4	9000	15	5	4	3	5	4	3	5	3	5	1500	5	3	4	5	5	4	3	5	5	3	1	2	2	3	1	2	3	1	1	2	3	1	1	3	3	3	3	2	3	1	2	2	3	3	1
2	23	3	2000	14	3	1	3	1	4	3	1	1	2	1500	1	4	2	1	1	3	4	3	4	1	2	0	1	2	2	3	2	2	1	3	3	2	2	3	3	3	1	0	1	1	0	0	1	2	1
1	24	4	8000	30	3	3	4	3	3	3	2	4	3	1500	4	1	4	3	2	4	4	4	4	2	1	2	1	2	1	2	1	2	2	2	2	3	2	3	3	2	1	1	0	0	0	1	0	1	1
1	31	4	12000	20	4	3	4	4	4	3	3	4	3	1500	5	4	4	3	3	3	5	3	3	1	1	1	0	1	2	1	2	1	2	2	2	2	2	3	3	3	2	2	1	2	2	1	2	2	1
2	37	4	8200	15	4	2	5	3	1	3	5	2	1	1200	5	4	5	5	5	5	5	5	5	0	0	0	0	0	0	0	0	0	1	1	1	4	1	1	1	1	0	0	0	0	0	0	0	0	0
2	22	3	5000	20	5	4	5	4	4	4	4	4	5	1000	5	4	5	5	4	5	4	5	4	2	3	3	3	2	3	3	2	2	1	2	2	2	2	2	2	2	2	1	1	0	0	2	0	2	2
1	23	4	5000	60	5	2	5	5	1	1	1	1	1	1000	5	3	5	2	3	1	5	1	5	1	0	0	0	3	2	0	0	3	1	2	2	2	1	1	1	2	0	0	0	0	0	0	0	0	0
1	23	4	5000	14	4	3	4	4	3	3	2	3	2	1000	4	4	4	4	4	4	4	3	3	0	0	0	0	0	0	0	0	0	2	2	2	2	2	2	2	2	0	0	0	0	0	0	0	0	0
1	20	4	10000	5	5	5	5	1	5	5	5	5	5	1000	5	5	5	5	5	5	5	5	5	3	3	3	3	3	3	3	3	3	1	1	1	4	1	1	1	1	3	0	0	0	0	0	0	0	0
1	30	3	8000	5	4	3	4	4	4	3	4	3	3	1000	4	3	4	4	4	3	3	4	3	2	2	3	2	2	3	2	2	2	2	3	4	2	2	2	3	3	2	1	2	3	2	2	3	2	2
1	25	5	5000	20	4	3	4	5	4	5	4	3	4	1000	4	5	4	3	4	3	4	5	4	2	3	1	2	2	3	2	1	2	2	2	3	1	2	2	1	3	2	1	1	2	2	1	2	2	1
1	32	4	7000	60	3	4	5	3	2	2	2	4	2	1000	4	3	4	3	3	3	4	4	3	2	1	2	1	3	2	2	3	2	2	2	3	2	2	2	3	2	2	2	1	2	2	1	2	2	1
1	24	4	5000	22	3	3	4	3	3	3	2	3	3	1000	4	5	4	4	4	4	4	4	5	2	2	2	1	1	2	3	2	2	2	2	2	3	2	3	3	2	1	0	1	0	0	1	1	1	1
1	30	4	6000	25	4	4	4	2	3	3	3	4	3	1000	4	2	4	2	3	3	4	4	2	2	1	2	2	1	2	2	2	3	2	2	2	2	3	3	2	3	1	2	1	2	2	1	2	2	1
2	20	4	5000	26	4	4	3	4	4	3	4	4	4	1000	4	3	4	4	4	4	4	4	3	3	2	2	2	1	2	2	2	1	2	2	3	3	2	3	3	3	2	1	2	2	2	1	2	2	1
2	26	4	2000	26	4	3	2	4	3	4	2	3	4	1000	4	3	4	2	4	4	4	5	4	1	2	3	2	2	1	2	1	2	4	3	4	4	4	4	3	4	2	3	2	3	2	3	2	2	3
1	18	4	1500	42	4	3	4	4	5	4	3	4	3	1000	4	3	4	4	5	4	3	4	5	3	2	2	2	1	2	2	1	1	2	3	1	2	2	3	2	3	2	1	2	2	2	1	2	2	1
1	28	4	2000	36	4	3	4	4	3	4	4	4	3	1000	4	4	3	4	4	3	4	4	3	1	2	2	1	2	2	2	1	2	3	3	3	3	2	2	2	3	2	1	2	1	2	2	2	1	1
1	25	3	5000	50	4	5	4	5	5	4	5	4	5	1000	4	1	2	4	1	2	5	4	5	1	2	1	1	2	3	1	1	2	2	1	1	3	2	3	1	4	3	2	3	2	3	2	3	2	3
1	22	3	3000	6	4	3	4	3	4	3	4	3	4	1000	4	3	4	3	4	4	3	4	3	2	1	2	1	2	1	2	1	2	2	2	3	3	2	3	3	2	2	1	2	1	2	1	1	2	1
1	29	4	4000	80	4	5	4	5	4	3	4	3	1	1000	3	2	4	2	4	4	3	4	2	2	1	2	2	3	1	2	1	0	2	4	1	2	1	2	1	1	1	0	0	0	0	0	1	0	0
2	24	4	10000	18	4	2	3	2	3	4	4	3	2	1000	4	4	3	4	3	4	3	4	3	1	2	1	2	2	1	1	2	1	2	2	1	3	3	4	2	1	1	0	1	1	0	1	0	1	0
2	26	4	8000	24	4	3	4	3	4	3	2	3	2	1000	4	4	3	3	4	2	3	3	4	2	3	2	1	2	1	0	1	1	2	2	2	2	2	2	2	2	2	1	1	1	1	1	0	1	1
1	20	4	6000	30	4	2	3	4	4	4	5	5	3	1000	4	5	4	4	5	4	4	5	3	1	1	0	2	1	3	2	1	1	2	2	3	1	2	1	3	3	1	1	1	0	0	1	1	2	1
1	25	3	5000	36	4	2	3	1	2	1	2	2	2	1000	4	3	4	3	4	4	4	2	4	0	1	0	1	2	2	3	0	2	1	1	2	2	1	1	1	3	2	1	1	1	1	2	2	2	1
1	35	3	15000	20	3	3	4	4	4	3	4	4	4	1000	3	3	3	4	4	4	4	2	3	0	0	1	0	1	1	1	0	1	1	1	1	1	1	1	1	2	0	0	1	1	1	1	0	1	1
1	27	4	6000	30	3	4	5	2	3	1	2	3	1	1000	4	3	4	3	4	4	5	1	2	0	0	0	0	0	1	2	0	0	1	1	2	1	1	1	1	2	1	1	0	2	1	0	1	0	1
1	26	4	8000	30	4	2	5	3	2	1	1	3	1	1000	4	3	4	3	4	1	3	1	2	0	0	0	0	0	0	1	0	1	1	1	1	1	1	3	1	1	1	0	0	0	0	0	0	0	1
1	25	4	7000	10	3	4	3	2	4	3	4	3	4	1000	3	3	2	2	2	3	2	3	3	0	0	0	0	0	1	0	0	0	2	1	1	2	2	2	2	2	0	0	0	0	0	0	1	0	0
1	26	4	5000	20	5	5	5	5	5	2	5	5	5	1000	5	5	5	5	5	5	5	5	4	0	0	0	0	0	0	0	0	0	1	1	1	2	1	1	1	1	0	0	0	0	0	0	0	0	0
1	20	3	7000	10	3	3	2	3	3	2	3	3	3	1000	2	3	3	2	3	2	4	3	4	0	0	0	0	0	0	0	0	0	1	2	2	1	1	1	2	3	0	0	0	0	0	0	0	0	0
2	26	4	3000	20	4	2	4	2	2	2	2	2	2	1000	4	4	4	4	4	4	4	1	4	0	0	0	0	0	0	0	0	0	1	1	1	2	2	1	1	1	1	1	1	1	1	1	1	1	1
1	26	4	3000	20	4	2	4	2	2	2	2	2	2	1000	4	4	5	5	5	4	4	5	5	0	0	0	0	0	0	0	0	0	1	1	1	2	2	2	1	1	1	1	1	1	1	1	0	2	1
1	26	4	5000	20	5	2	4	2	2	2	2	2	2	1000	4	3	3	4	4	5	4	2	4	0	0	0	0	0	0	0	0	0	1	1	1	2	2	1	1	1	1	1	1	1	1	1	0	1	1
2	26	4	5000	20	5	5	5	5	5	1	5	5	5	1000	5	4	5	5	5	4	5	5	5	0	0	0	0	0	0	0	0	0	1	1	1	2	2	2	1	1	0	0	0	2	2	0	0	1	1
1	23	4	5000	20	5	4	5	4	2	2	2	2	2	1000	5	4	5	4	5	4	5	3	4	0	0	0	0	0	0	0	0	0	1	1	1	1	1	1	1	3	0	0	1	0	0	0	0	0	1
1	28	3	6000	16	4	4	4	4	4	4	4	4	4	850	4	4	4	4	4	4	4	4	4	2	2	2	2	2	1	2	1	2	3	3	3	3	2	2	2	3	1	1	1	1	1	1	1	1	1
1	22	4	6000	5	4	3	4	3	3	4	4	3	3	800	4	4	4	3	4	3	5	3	5	1	1	1	0	1	1	1	0	1	2	3	3	2	2	2	2	3	1	1	2	1	1	1	1	2	1
1	28	4	7500	30	4	3	4	2	2	1	1	2	1	800	4	5	4	5	4	3	3	1	4	0	0	0	0	0	0	0	0	0	2	2	2	2	2	3	1	1	0	0	1	1	1	0	0	0	0
2	20	4	3000	40	4	1	1	1	1	1	1	1	1	800	4	5	4	5	4	1	1	1	1	0	0	0	0	0	0	0	0	0	1	1	1	1	2	2	1	1	0	0	0	0	0	0	0	0	0
1	28	3	3500	4	4	5	4	5	4	5	4	3	4	800	4	5	4	5	4	4	5	4	5	2	3	2	3	2	3	2	3	2	2	4	3	1	2	1	3	4	2	3	2	3	2	3	2	2	3
2	23	4	5000	18	4	3	4	4	3	4	4	3	4	800	4	5	5	4	3	4	4	3	4	3	2	3	2	1	2	2	3	2	2	3	2	2	3	3	4	4	2	1	2	2	2	3	3	1	1
1	23	4	6000	40	4	2	4	4	4	2	3	4	4	800	4	2	4	4	5	4	3	4	3	2	2	1	2	2	1	2	3	1	2	2	3	1	2	2	1	1	1	2	1	3	1	2	2	2	1
1	22	4	15000	10	4	1	1	1	1	1	1	1	1	800	1	1	1	1	1	1	1	1	1	0	0	0	0	0	0	0	0	0	1	1	1	1	1	1	1	1	0	0	0	0	0	0	0	0	0
1	20	4	3000	35	2	1	1	2	3	2	1	1	1	800	2	1	3	4	4	2	4	1	2	0	0	0	0	0	0	0	0	0	1	1	1	1	2	1	1	1	0	0	0	0	0	0	0	0	0
1	22	4	2000	3	4	3	5	2	3	4	5	4	3	700	4	2	3	5	4	5	2	3	5	2	1	3	2	1	2	3	2	1	3	4	3	3	1	2	4	2	2	1	3	2	0	3	2	1	3
2	25	4	5000	30	5	4	4	3	4	3	2	3	2	700	5	4	4	5	4	4	5	4	4	2	3	2	3	1	1	2	1	1	1	1	1	2	2	1	1	1	0	0	0	0	0	0	0	0	0
2	25	3	5988	10	4	3	4	5	4	3	4	5	3	688	4	2	3	2	2	4	5	4	5	2	3	2	3	2	3	3	2	2	4	4	3	4	4	4	3	4	2	2	1	2	1	2	2	2	1
1	21	4	10000	30	4	4	4	4	4	4	3	4	3	680	4	4	3	4	3	3	4	3	3	2	2	1	2	0	2	1	1	1	2	3	3	2	2	2	3	3	2	1	2	2	1	1	1	2	1
1	22	4	1200	68	5	4	4	5	5	5	4	5	5	600	5	5	4	5	5	4	5	2	5	1	1	3	2	2	2	3	2	2	3	4	4	4	4	4	3	4	2	2	3	2	2	3	2	3	2
1	36	4	5000	6	5	3	5	4	5	4	5	4	5	600	5	4	5	5	4	4	5	4	5	3	2	3	3	2	3	2	3	3	1	2	2	1	1	1	2	2	0	1	1	0	1	1	1	0	1
2	25	4	8000	4	4	3	2	3	2	3	2	2	1	600	4	5	3	4	3	5	4	3	3	1	1	0	2	3	2	1	2	1	3	1	2	2	2	1	2	3	1	0	2	1	2	0	1	1	0
1	34	2	8000	20	4	3	4	4	5	4	4	3	3	600	4	3	3	4	4	3	4	4	3	2	1	1	2	1	1	2	2	1	2	1	2	2	2	3	2	2	1	0	1	0	0	0	0	1	1
1	20	3	2000	20	3	2	3	2	2	1	3	2	4	600	4	3	4	4	3	2	4	3	4	1	0	1	1	0	1	1	0	0	2	2	2	2	2	1	2	3	0	0	1	0	0	1	0	1	1
1	22	4	5000	10	3	3	2	4	3	2	3	3	4	500	4	3	4	2	3	4	4	3	2	2	1	1	2	1	1	1	2	2	3	3	2	2	3	2	2	2	2	1	2	2	2	1	2	1	1
1	30	2	5000	15	3	2	2	2	2	2	2	2	2	500	3	3	4	3	4	4	2	2	3	1	1	1	2	1	2	0	0	1	1	1	1	1	1	1	1	1	0	0	0	0	0	0	0	0	0
2	25	4	6000	15	4	2	5	2	2	1	2	4	1	500	5	3	2	3	5	3	5	4	5	1	3	1	0	1	0	2	0	1	2	1	2	4	2	1	1	1	0	0	1	0	0	0	0	0	0
2	30	4	4500	7	3	2	4	2	2	2	2	3	2	500	3	4	4	3	4	3	3	3	4	1	0	1	0	1	0	1	0	0	2	1	2	3	3	2	1	1	1	0	0	1	1	0	0	1	0
2	35	3	8000	7	3	3	2	3	3	2	3	2	1	500	3	2	3	4	3	3	4	3	2	1	1	0	1	0	0	0	0	0	2	2	2	3	3	4	1	1	1	1	0	0	0	0	0	0	1
1	33	4	7000	7	3	1	3	2	2	1	1	2	1	500	4	4	4	4	3	4	3	4	3	0	0	0	0	0	0	3	0	0	1	2	2	2	2	2	1	2	0	0	0	0	0	1	0	1	1
2	30	4	6000	35	4	3	4	2	2	3	4	4	2	500	4	4	5	4	4	4	4	1	3	0	1	1	0	0	0	0	0	0	2	2	2	3	2	2	2	2	0	0	1	0	1	1	0	1	1
2	28	4	6000	12	4	4	5	1	4	5	5	5	5	500	5	4	5	4	5	5	5	5	5	1	3	3	1	3	3	3	3	3	3	3	2	2	3	3	1	2	1	1	2	1	2	1	2	2	1
1	30	4	8000	20	3	3	4	4	3	4	3	4	3	500	3	4	3	4	3	4	4	3	4	2	2	3	3	1	2	2	3	2	2	3	2	2	3	3	3	2	2	1	2	2	1	1	2	2	1
2	45	2	3500	20	5	4	5	4	4	5	4	5	4	500	5	4	5	3	4	4	4	5	4	2	2	2	3	3	2	2	2	2	1	1	2	1	1	2	4	2	3	3	2	2	3	2	2	1	1
1	25	3	12000	24	3	4	3	4	3	4	3	4	5	500	4	3	5	3	5	5	3	5	3	2	2	1	3	1	3	2	2	3	2	3	4	2	2	2	3	4	2	1	2	3	3	1	2	2	1
1	24	3	6000	2	4	3	5	4	4	5	4	3	4	500	4	5	4	5	5	5	4	5	4	3	1	2	3	3	1	2	1	3	2	4	3	3	2	1	4	3	1	3	2	1	2	3	1	2	3
1	23	3	3000	25	4	5	4	4	3	4	5	4	4	500	4	5	4	4	3	4	4	5	4	2	3	2	2	2	3	1	2	2	2	4	4	3	4	3	3	4	2	3	2	2	3	2	3	3	2
2	25	3	5000	68	3	4	4	3	4	4	5	3	2	500	4	3	4	5	4	4	4	5	4	2	3	2	1	2	2	3	2	2	1	3	1	2	1	2	1	2	1	1	0	0	0	1	0	1	0
1	22	4	1200	2	4	5	4	3	4	4	5	4	4	500	4	4	5	4	3	5	4	4	4	2	2	3	2	1	2	2	2	2	2	2	1	2	1	2	2	3	1	0	2	1	1	0	1	2	1
1	24	4	7000	20	4	3	4	5	4	3	4	3	3	500	4	5	4	3	4	3	4	4	5	2	3	2	1	2	3	2	1	2	2	2	2	2	2	1	2	3	1	1	2	2	1	1	2	2	1
1	18	2	3500	10	4	4	4	4	4	4	4	4	4	500	4	4	4	4	4	4	4	4	4	1	2	2	1	3	2	2	2	2	2	3	4	1	2	3	3	2	2	1	1	2	2	2	2	3	3
2	21	3	4000	18	3	2	4	2	4	3	2	3	3	500	4	3	4	3	3	4	4	4	3	2	2	1	1	1	2	3	2	2	2	2	3	3	2	3	3	2	1	0	1	0	0	1	0	1	1
1	23	4	5000	7	2	4	3	5	4	3	2	1	3	500	4	5	3	2	1	3	4	5	4	2	1	3	2	1	0	1	2	3	2	4	3	3	4	3	3	4	2	1	0	1	0	2	0	3	2
1	32	2	6000	3	4	4	4	4	4	3	4	3	3	500	4	3	3	4	3	4	3	4	3	2	2	1	2	2	2	1	1	2	2	3	4	3	2	2	4	3	2	2	3	2	2	2	2	2	2
1	23	4	4000	14	4	3	4	3	4	3	3	4	3	500	4	4	3	4	4	4	3	4	3	1	2	2	1	2	2	1	2	2	2	3	2	3	2	2	2	3	1	2	1	1	1	2	1	2	1
1	28	4	5000	30	3	4	3	3	4	4	3	3	4	500	4	3	2	3	4	4	3	4	3	2	1	2	2	2	1	2	1	2	2	1	1	1	1	2	1	1	0	0	0	1	1	0	0	0	0
1	20	3	50000	20	3	2	3	4	3	4	4	3	3	500	3	4	4	3	4	2	4	4	3	2	1	2	2	2	1	1	1	2	2	2	3	2	2	3	3	3	2	2	2	3	2	3	1	3	1
2	21	4	4000	30	3	4	4	4	4	3	4	4	5	500	4	5	5	4	4	4	4	2	4	1	2	2	3	1	1	2	1	1	2	3	3	3	3	4	3	3	1	1	1	1	1	2	1	1	1
1	33	2	8500	26	4	3	4	3	3	4	3	3	3	500	4	3	3	4	5	4	4	3	5	2	2	1	1	2	1	1	1	2	3	3	1	2	2	3	1	1	1	1	2	1	1	1	0	1	1
1	20	2	6000	20	4	3	4	3	4	3	2	3	2	500	3	3	2	3	3	4	4	4	3	2	1	1	2	1	2	1	2	1	2	2	3	2	2	3	3	3	2	1	1	2	2	2	1	2	1
1	20	4	3000	20	3	3	4	2	4	3	2	3	3	500	4	3	4	4	3	4	3	4	3	1	1	1	2	1	2	1	1	2	2	2	2	3	3	3	3	2	1	0	1	0	0	1	0	1	1
1	20	3	2000	10	2	3	2	2	3	1	1	3	2	500	4	3	3	4	3	3	4	4	3	1	2	0	2	1	1	2	2	0	1	1	1	1	1	2	2	2	0	2	0	0	1	0	0	0	1
2	26	4	4000	20	3	2	3	2	4	2	3	2	3	500	4	3	4	4	4	4	5	4	4	1	1	1	0	1	1	0	1	3	2	2	2	2	2	3	2	2	0	1	1	0	1	0	1	1	1
1	26	4	8500	6	4	5	4	3	4	4	5	3	3	500	4	5	3	4	4	4	5	4	3	2	1	0	1	1	1	2	0	1	3	1	2	2	1	2	2	3	1	0	1	0	1	0	1	2	1
2	20	4	3000	5	4	2	2	4	2	2	2	3	4	500	4	4	3	4	4	4	4	3	3	0	1	1	0	1	1	2	0	1	2	2	3	2	3	2	2	3	2	1	1	1	2	1	0	2	2
1	22	4	5000	7	3	2	4	2	1	1	2	2	1	500	3	2	4	3	4	2	3	3	4	1	2	0	1	0	0	1	0	2	2	2	2	1	1	3	2	3	1	2	2	1	0	0	1	1	2
1	20	4	5000	30	4	3	4	3	4	5	4	4	4	500	4	3	4	4	4	4	4	4	4	2	1	2	2	0	0	0	0	0	3	3	2	2	2	2	1	2	2	1	2	0	0	0	0	1	0
1	25	4	6000	12	4	3	4	3	5	4	4	5	3	500	4	3	5	4	5	4	5	2	3	1	0	1	0	0	1	2	1	0	3	4	2	4	3	2	4	3	1	1	2	1	1	2	1	1	1
1	27	3	4500	26	5	3	5	3	4	3	5	4	2	500	3	2	2	1	4	5	5	5	5	1	0	1	1	0	1	1	0	1	2	1	2	1	1	1	1	3	1	0	0	0	0	1	0	1	3
1	25	4	10000	10	3	4	5	1	1	3	2	1	2	500	4	5	3	4	5	4	5	1	3	1	1	0	0	0	3	1	0	0	1	1	3	1	1	1	1	2	1	0	0	1	0	1	0	1	1
1	32	4	7500	21	3	2	4	3	4	2	2	5	2	500	4	3	4	2	4	2	4	3	3	0	0	0	0	2	1	2	0	1	2	3	2	2	2	3	3	3	1	1	1	2	1	1	0	1	2
1	28	5	20000	30	3	1	2	3	1	1	1	1	1	500	3	3	2	3	4	2	4	1	1	0	0	0	0	0	0	2	0	0	2	2	2	2	2	2	2	2	1	0	0	0	0	0	0	0	0
1	38	4	8000	20	2	2	2	2	2	2	2	2	2	500	3	2	2	4	2	2	2	2	2	1	0	1	0	0	0	0	0	0	1	1	1	1	1	1	1	1	0	0	0	0	0	0	0	0	0
1	28	4	6000	14	4	3	4	3	4	3	2	2	2	500	4	5	5	5	4	5	4	5	4	0	0	0	0	0	0	1	0	1	1	1	1	2	1	1	1	2	1	0	1	0	1	0	1	0	1
2	24	4	3500	50	4	3	4	2	3	3	4	5	4	500	5	5	5	5	3	5	5	2	3	0	0	1	0	0	0	0	0	0	2	2	2	2	2	3	2	3	1	1	1	1	1	1	1	1	1
2	23	4	6000	20	5	5	5	5	2	2	4	4	2	500	5	5	5	5	5	5	5	2	5	0	0	0	0	0	0	0	0	0	1	2	1	2	1	2	2	2	1	1	1	1	1	1	1	0	1
1	21	4	3500	28	5	1	3	1	1	3	3	5	1	500	3	3	3	1	5	1	5	1	1	0	0	0	0	0	0	0	0	0	1	1	1	1	1	1	1	2	0	0	0	0	0	0	0	0	0
1	26	4	3000	20	4	2	4	2	2	2	2	2	2	500	4	3	3	3	4	2	4	4	4	0	0	0	0	0	0	0	0	0	1	1	1	2	2	1	1	1	1	1	1	1	1	1	0	1	1
2	22	4	2000	16	1	2	2	1	2	1	2	2	2	450	4	5	4	3	4	4	4	4	5	0	1	0	0	0	0	0	0	0	2	1	1	2	1	2	1	1	0	0	0	0	0	0	0	0	0
1	28	4	4500	48	4	3	4	4	3	2	4	3	4	400	5	3	2	4	4	2	2	4	3	2	1	3	2	2	1	0	1	2	1	1	2	2	3	2	1	2	2	1	2	1	1	3	2	2	1
1	22	4	2000	30	3	2	3	3	4	2	1	3	2	400	4	5	4	4	4	3	4	4	5	1	0	0	0	2	2	3	2	3	2	1	1	2	2	3	3	3	1	0	1	1	0	0	0	1	1
2	21	4	3000	20	3	3	4	2	4	3	2	3	3	400	4	3	4	3	3	4	4	4	3	1	1	1	0	1	1	1	2	2	2	2	2	3	2	3	3	2	1	0	1	0	0	1	1	1	1
1	27	3	780	48	4	3	2	4	2	1	4	2	4	400	4	2	3	2	4	3	4	2	3	0	1	0	0	0	2	0	1	1	3	3	1	4	4	2	2	1	2	1	2	1	0	2	1	2	1
1	22	4	3000	30	4	3	4	4	4	3	3	4	3	328	4	4	3	3	4	3	4	4	4	2	2	1	2	2	2	2	1	2	2	2	3	2	2	3	2	3	2	2	1	2	2	2	1	2	2
2	26	4	15889	35	5	4	5	5	4	4	5	4	5	325	5	4	4	5	5	4	5	4	4	3	2	2	3	3	1	1	2	3	1	2	2	2	1	2	4	3	3	0	2	1	0	1	0	3	1
1	24	4	6000	30	5	2	4	3	5	2	3	4	4	300	5	4	5	5	5	4	5	5	4	3	2	3	3	1	2	2	3	2	1	2	2	2	1	3	3	4	3	2	2	2	1	2	2	3	2
1	20	4	2000	30	4	2	4	2	1	2	1	1	1	300	4	5	4	5	4	4	4	5	5	0	2	2	3	2	3	2	0	2	1	1	1	1	1	1	1	1	1	0	0	0	0	0	0	1	1
1	25	4	3000	10	4	1	3	4	4	1	1	2	1	300	4	5	4	4	3	3	4	3	4	2	2	1	2	0	1	1	2	1	3	2	1	2	3	2	2	3	2	1	2	3	1	2	1	1	1
1	30	4	5000	10	3	2	3	3	3	3	3	4	3	300	4	3	4	3	4	3	4	4	3	1	2	1	2	1	2	1	1	1	2	2	2	2	3	3	3	3	1	1	1	0	1	0	0	1	1
1	24	4	6500	20	4	4	4	5	3	3	4	4	1	300	4	4	4	3	4	4	4	3	3	1	1	2	0	1	1	1	0	1	2	3	4	3	4	3	2	2	2	2	2	2	2	2	1	2	1
1	25	3	1500	10	3	1	1	1	4	4	3	2	3	300	4	4	4	4	5	4	4	1	1	0	0	1	0	0	0	0	0	0	1	1	1	2	2	2	1	3	0	0	0	0	0	0	0	0	0
2	21	4	2500	40	3	1	3	2	1	2	1	1	2	300	2	3	2	2	2	1	3	1	1	0	1	0	0	0	0	0	0	0	1	1	1	1	1	1	1	1	0	0	0	0	0	1	0	0	1
1	25	4	3000	5	3	2	4	3	4	3	4	3	4	300	3	3	4	3	4	4	4	2	2	0	0	0	0	0	0	0	0	0	2	2	3	3	2	3	2	3	0	0	0	0	1	2	1	0	1
1	26	4	3000	8	3	4	4	3	4	4	3	4	3	300	3	4	4	3	3	4	4	3	3	2	2	3	2	3	3	2	1	2	1	3	3	1	2	1	2	2	3	1	1	2	1	3	2	3	1
1	26	4	18000	36	5	4	5	4	4	5	4	5	4	300	5	4	5	5	5	4	5	5	5	2	3	2	2	2	2	2	3	2	2	4	3	2	1	2	3	4	3	3	2	2	2	3	3	2	3
1	22	4	1500	30	4	3	5	4	4	2	3	3	4	300	4	3	4	2	3	4	4	2	4	1	2	2	3	2	2	3	2	1	2	2	4	2	2	3	3	2	1	3	2	2	1	2	1	2	1
1	28	4	2000	2	3	2	4	4	4	2	1	4	2	300	4	3	4	3	4	4	5	4	4	2	1	2	3	1	2	2	2	2	2	3	2	2	1	2	3	4	2	3	2	2	1	2	1	3	2
1	23	4	6000	12	5	4	5	4	4	3	4	4	3	300	4	4	2	2	4	3	4	3	4	3	2	2	1	2	3	1	2	0	1	1	1	1	2	1	3	3	2	1	2	3	1	2	1	3	2
1	24	4	5600	30	4	5	4	3	4	4	3	4	3	300	4	5	3	4	4	3	5	4	4	3	2	2	1	2	2	1	1	2	2	4	3	2	3	2	2	3	2	3	2	2	1	2	2	2	3
1	21	3	3000	8	3	4	3	3	3	2	2	4	3	300	4	3	3	4	3	4	3	4	3	1	3	2	1	1	2	2	1	2	2	1	2	2	2	1	1	3	2	2	1	2	1	2	2	1	2
2	25	4	3000	18	4	5	5	4	3	2	5	5	3	300	4	5	4	5	5	5	4	2	4	1	1	2	1	1	2	2	1	3	1	1	1	2	1	1	1	2	1	0	0	1	1	2	0	1	0
2	25	4	1500	15	3	3	4	1	4	2	3	3	2	300	4	3	4	3	5	4	5	3	4	1	2	0	3	2	0	1	2	2	1	1	2	2	1	2	1	1	2	0	2	1	1	1	0	3	0
2	36	4	3000	4	5	4	3	3	1	2	2	3	1	300	5	3	2	4	4	4	4	4	5	3	2	0	1	1	0	0	2	3	1	1	4	2	1	1	1	1	3	2	2	2	2	1	2	3	1
2	23	4	3000	18	3	2	3	3	4	2	3	4	3	300	4	3	4	3	4	4	3	4	3	1	0	1	0	1	2	1	2	2	2	2	2	3	2	2	2	2	1	0	1	0	0	1	0	1	1
2	25	4	3800	10	5	4	5	4	4	5	4	4	5	300	5	4	4	5	4	5	4	3	4	1	2	1	1	2	1	2	0	0	1	1	1	2	1	1	1	1	1	0	1	0	0	1	0	1	0
1	25	4	3000	30	4	3	3	4	4	2	3	4	4	300	4	5	5	2	4	5	1	2	3	0	0	1	0	0	0	2	0	3	1	1	2	3	3	2	2	2	2	2	1	1	0	1	0	1	2
1	25	3	8000	30	5	1	5	4	1	1	1	1	1	250	4	1	4	4	2	4	5	1	1	0	0	0	0	1	1	3	2	2	1	1	1	1	1	1	1	1	0	0	0	0	0	0	0	0	0
1	24	4	2000	20	3	3	4	3	2	2	3	2	2	240	4	3	3	3	4	4	4	4	3	1	2	1	1	1	1	1	1	1	1	1	1	2	1	1	1	2	0	0	0	0	0	0	0	0	1
2	34	4	20000	12	4	2	3	4	3	4	3	3	3	200	4	4	4	4	5	5	5	4	4	2	3	2	2	1	2	1	0	2	2	4	2	2	2	2	3	3	0	0	0	1	0	0	1	2	1
1	21	4	15000	5	4	3	3	4	4	3	3	4	4	200	4	4	5	5	4	5	4	4	5	2	1	1	1	2	2	1	1	2	2	1	2	2	2	3	1	2	1	1	1	0	1	0	1	0	0
1	26	4	3000	6	3	2	3	3	1	1	1	4	1	200	4	4	4	3	4	3	4	2	2	1	0	1	0	1	1	1	0	1	2	1	2	2	2	2	1	1	1	0	0	0	1	1	0	1	1
1	24	3	4000	20	5	3	5	3	2	2	1	4	2	200	4	4	3	2	5	2	2	2	5	1	1	1	0	1	1	0	0	0	2	2	2	2	2	2	2	2	1	1	1	1	1	1	1	0	1
1	25	4	3000	30	4	2	3	4	2	3	2	4	2	200	4	4	2	5	4	4	4	2	2	0	0	0	0	1	2	1	0	1	2	1	2	2	1	2	1	2	0	1	1	0	1	1	0	1	1
1	26	3	8500	28	5	4	5	5	3	4	2	4	1	200	5	4	5	3	2	4	4	1	3	0	0	0	0	1	0	2	0	2	2	3	3	4	2	3	1	4	2	3	3	2	2	2	3	2	2
2	34	4	20000	15	4	3	3	4	3	2	3	2	2	200	4	4	3	3	3	3	2	3	3	0	1	1	1	0	0	1	1	0	2	2	2	2	2	2	3	2	1	0	0	0	0	0	0	0	0
2	29	4	6000	30	4	2	4	2	2	1	1	3	1	200	3	4	4	4	5	4	3	2	2	1	0	1	0	0	1	0	0	1	2	2	2	2	2	2	2	3	1	1	0	1	0	0	0	0	0
1	22	3	8000	64	4	2	4	3	1	1	1	3	2	200	4	4	4	4	4	2	4	2	4	0	0	1	1	1	1	0	0	0	1	1	1	1	2	2	1	2	1	0	1	0	0	1	0	1	1
1	23	3	4000	21	4	2	4	3	2	2	2	2	1	200	4	3	4	4	4	4	3	4	4	0	0	1	0	0	0	0	0	0	2	2	2	2	2	2	2	3	0	0	1	0	0	0	0	0	1
1	26	4	8000	6	4	3	4	5	4	2	1	2	1	200	4	2	4	5	5	2	5	5	5	2	3	3	3	3	2	3	1	3	2	1	2	2	2	2	2	4	1	2	1	0	2	0	2	1	1
1	23	3	1500	3	4	5	4	4	5	4	4	4	4	200	5	4	4	4	4	3	4	3	4	3	2	3	2	3	2	2	2	3	1	3	4	2	1	2	4	3	3	2	3	2	2	3	2	3	2
1	32	4	5000	6	5	4	5	5	4	4	5	5	3	200	2	1	1	1	5	5	3	5	4	3	2	2	2	3	2	3	2	2	2	2	3	3	3	1	3	2	2	1	1	2	1	1	2	2	1
2	26	4	6000	18	4	4	4	4	4	5	4	4	4	200	4	4	4	5	4	4	4	4	4	2	3	2	2	2	2	2	2	2	3	3	3	3	3	3	3	3	2	2	2	2	2	2	2	2	2
1	26	4	11000	50	4	2	5	1	1	1	1	2	2	200	3	4	2	2	1	1	4	1	2	1	2	2	3	1	2	2	2	2	1	1	2	1	1	3	1	3	3	3	1	1	1	0	1	1	1
1	20	3	2000	9	4	5	3	2	3	4	5	4	2	200	5	3	4	3	5	4	5	3	4	1	2	3	0	1	3	2	2	3	1	2	1	2	1	2	2	2	1	1	0	2	0	0	0	1	0
1	28	4	5000	15	4	3	4	3	4	3	4	3	4	200	4	3	4	3	4	4	3	4	3	2	1	3	2	2	1	3	2	1	2	2	3	3	3	2	2	3	2	1	2	1	2	1	2	2	1
1	20	4	8000	20	4	5	4	3	4	4	3	4	4	200	4	3	4	4	2	4	3	4	4	2	2	2	1	2	1	1	3	2	2	3	4	1	2	2	4	2	2	1	2	3	2	2	1	1	2
1	22	4	2000	14	3	4	4	3	3	4	4	3	4	200	3	4	4	3	3	4	3	3	4	1	2	2	1	1	2	2	1	2	3	2	2	3	4	3	3	2	1	2	2	1	1	1	2	1	2
1	21	4	8000	28	4	5	4	5	4	5	3	4	5	200	4	5	5	4	5	3	4	5	4	2	3	2	3	1	0	1	1	1	2	4	3	1	1	2	3	2	2	3	2	1	1	2	2	2	3
1	28	4	2000	10	4	3	3	4	4	3	4	4	2	200	4	3	4	3	4	3	4	4	3	1	2	1	2	1	1	2	1	2	2	2	2	2	2	1	2	2	1	0	1	1	1	0	1	1	1
2	25	4	7000	6	3	1	2	1	2	1	1	3	1	200	4	1	3	3	2	3	4	2	1	1	1	1	0	2	2	3	1	1	2	1	2	1	1	2	1	2	0	1	1	0	1	2	0	1	1
1	25	3	6000	20	5	3	3	3	3	1	2	3	1	200	5	3	4	4	4	3	4	3	3	1	1	2	1	2	2	1	0	2	3	3	3	3	3	3	3	3	1	0	1	1	1	1	1	2	1
1	20	4	1500	15	3	4	3	3	4	4	3	3	3	200	4	4	4	4	3	3	3	3	4	1	1	2	1	1	1	1	2	2	3	3	2	3	3	4	2	2	1	1	0	1	1	1	0	1	0
2	25	4	7000	15	3	3	3	3	3	3	3	4	2	200	2	3	2	3	4	3	3	2	2	1	1	1	0	1	1	1	0	1	2	3	2	2	2	2	2	2	1	1	1	1	1	1	1	1	1
1	28	4	6000	3	4	3	4	5	3	4	3	4	3	200	4	3	4	5	3	5	3	4	5	2	1	1	0	1	0	1	0	1	2	2	1	1	2	1	2	2	0	1	0	1	1	0	1	1	0
1	28	4	15000	8	4	3	4	4	4	3	3	4	4	200	4	4	3	4	4	4	3	4	4	1	2	2	0	0	0	2	0	0	2	3	2	2	2	2	2	2	2	2	3	0	2	2	3	2	2
1	20	4	2000	50	3	2	3	3	4	3	4	3	2	200	4	2	4	4	5	4	5	3	4	1	1	0	0	1	1	1	0	1	1	2	2	1	1	2	1	2	1	0	0	1	0	0	0	1	1
1	25	4	1500	42	3	2	2	2	1	1	1	2	1	200	4	3	4	4	2	3	4	3	3	0	0	0	0	1	1	1	0	1	1	2	2	2	3	2	2	2	2	1	2	2	1	1	0	1	1
1	25	3	6000	38	4	2	3	2	4	4	2	4	4	200	4	4	4	5	4	2	4	1	3	0	0	0	1	1	0	0	0	0	2	2	3	1	2	2	2	2	1	0	0	0	0	0	1	0	0
1	20	4	5000	30	4	5	4	5	4	5	4	5	4	200	4	5	4	5	4	4	5	4	5	0	0	0	0	0	0	0	0	0	3	4	3	3	4	3	3	4	2	3	2	3	2	2	3	2	3
2	35	1	1800	4	5	1	4	3	5	1	4	5	5	188	5	5	3	3	5	5	4	3	4	3	2	3	2	3	0	2	1	2	1	4	4	1	4	3	3	4	1	2	2	3	3	2	1	3	3
1	23	3	4500	4	3	2	3	2	3	2	3	2	3	150	4	3	4	3	4	4	3	4	3	3	1	1	0	1	1	1	0	1	1	2	3	1	2	3	2	2	1	0	1	0	1	0	0	1	1
2	26	4	8000	15	3	3	3	3	3	3	3	4	2	150	2	3	2	3	4	3	3	2	2	1	1	1	0	1	1	1	0	1	2	3	2	2	2	2	2	2	1	1	1	1	1	1	1	1	1
1	21	4	2000	30	4	4	4	4	4	4	5	4	4	150	5	4	4	4	4	5	4	3	4	1	1	0	0	0	0	0	0	0	2	1	1	3	2	2	2	2	0	0	0	0	0	0	0	0	0
1	26	4	7000	21	4	1	2	1	1	1	3	2	1	150	3	4	2	3	4	2	3	2	1	0	0	0	0	0	0	0	0	0	1	1	1	1	1	1	1	1	0	0	0	0	0	0	0	0	0
1	23	3	2000	4	4	3	5	3	3	5	5	4	1	128	4	3	4	4	4	2	4	2	3	0	1	0	0	0	0	0	0	0	1	1	1	2	2	1	1	1	1	0	0	0	0	0	1	0	1
1	25	3	4000	30	4	2	4	5	4	3	4	4	2	120	4	1	3	4	4	4	3	4	5	0	1	0	0	0	0	0	0	0	1	1	2	2	2	1	1	3	2	1	0	2	2	2	2	2	1
1	21	4	5600	6	5	4	3	4	3	4	2	4	3	105	3	4	3	5	4	4	3	4	3	0	1	0	1	0	0	0	1	0	2	1	1	2	2	3	1	1	0	1	2	1	0	0	1	1	0
1	25	4	5000	16	3	4	5	4	5	4	3	4	3	100	3	4	5	4	5	3	4	3	5	1	2	3	2	3	2	1	2	1	2	2	3	1	3	2	4	3	2	3	3	2	1	2	2	1	2
2	24	4	5000	9	4	3	4	4	4	3	4	3	3	100	4	4	3	3	4	2	3	4	3	2	2	1	2	0	2	0	0	1	3	3	3	3	2	1	3	2	2	1	1	2	1	2	2	1	2
1	21	4	2000	6	3	1	2	2	1	1	1	2	2	100	2	1	2	2	2	2	4	1	2	0	0	0	0	0	0	0	0	0	1	1	2	1	1	1	1	2	0	0	0	0	0	0	0	0	0
2	22	4	5000	10	3	2	2	2	1	1	1	2	1	100	2	2	2	3	2	2	3	3	2	0	0	0	0	0	0	0	0	0	2	1	2	2	2	2	1	2	0	0	0	0	0	0	0	0	0
2	24	3	5000	10	2	2	3	2	2	2	2	2	2	100	4	2	3	3	3	3	3	2	2	0	0	0	0	0	0	0	0	0	1	1	1	1	1	1	1	1	1	1	1	0	0	0	0	0	0
1	21	3	3000	5	5	5	4	5	5	5	5	4	5	100	5	4	5	4	5	5	4	5	4	3	3	3	3	3	2	3	2	3	1	3	3	1	2	1	3	4	2	2	3	3	3	3	3	3	0
2	30	3	500	5	5	4	5	4	5	4	4	5	4	100	5	5	5	5	5	5	4	4	5	3	2	3	2	3	2	3	2	3	1	3	4	1	2	1	3	4	3	2	3	2	3	3	2	3	2
2	25	4	2000	30	5	4	5	4	4	5	3	4	2	100	4	3	5	4	2	3	5	2	5	3	1	2	2	0	1	2	3	3	2	4	3	1	2	3	4	3	1	2	2	3	2	1	3	2	2
1	22	4	2000	72	5	4	4	5	4	4	5	4	4	100	5	4	4	5	4	4	5	3	4	2	1	2	2	3	2	1	2	2	1	1	2	1	2	2	2	1	2	1	2	1	1	0	1	1	0
2	30	4	5000	16	4	2	3	2	2	3	2	3	3	100	4	3	4	3	2	4	3	4	4	2	1	2	1	2	3	2	1	2	2	2	3	2	3	3	3	2	3	2	2	1	1	2	2	2	1
2	18	3	1000	10	3	3	4	3	4	3	2	4	2	100	4	3	4	3	4	4	5	3	4	1	2	1	0	2	1	2	1	2	3	4	4	3	3	4	4	3	1	0	0	1	1	2	1	2	1
2	21	4	1500	14	3	2	3	2	3	2	2	4	3	100	4	3	4	3	4	2	4	3	2	1	2	1	1	2	1	2	1	1	2	2	1	3	2	3	1	2	2	1	2	0	1	1	2	2	1
1	23	5	2000	10	3	3	3	3	3	3	3	3	3	100	4	4	4	4	4	4	4	4	4	1	1	1	1	1	1	1	1	1	1	1	1	1	1	1	1	1	1	1	1	1	1	1	1	1	1
1	26	3	9000	12	3	3	2	2	1	2	2	3	1	100	3	2	4	3	5	2	4	2	2	0	1	2	0	1	1	2	0	1	2	2	2	2	3	2	1	1	0	0	0	1	1	1	0	1	1
2	22	4	1500	3	4	4	4	1	1	2	1	4	1	100	4	3	1	1	4	1	1	2	1	0	0	0	0	0	0	1	0	0	1	1	1	2	2	1	1	2	1	0	1	1	0	1	0	2	2
1	25	3	3000	10	3	1	4	3	1	1	1	1	1	100	3	3	3	2	1	1	3	1	1	0	0	0	0	0	0	0	0	0	1	1	1	1	1	1	1	1	0	0	0	0	0	0	0	0	0
1	25	4	6000	48	3	3	3	2	4	2	1	2	1	100	3	3	3	3	5	2	5	3	3	0	0	0	0	0	0	0	0	0	1	1	1	1	1	1	1	1	0	0	0	0	0	0	0	1	1
2	30	4	6500	7	4	3	4	4	3	4	2	3	2	88	4	4	4	4	4	3	4	3	3	0	0	0	0	1	1	2	1	2	1	1	1	1	2	2	3	3	1	1	1	1	1	1	0	1	1
1	23	4	2000	53	4	2	4	3	4	4	4	3	4	60	4	4	4	4	4	4	4	4	4	2	2	3	1	2	2	2	1	2	2	3	3	2	2	3	2	3	2	2	2	1	2	2	1	2	3
1	20	4	1200	40	4	3	4	3	3	3	3	3	3	60	4	4	4	3	4	4	4	3	3	2	1	2	2	2	1	1	2	2	2	2	2	1	2	2	2	2	0	0	0	0	0	0	0	0	0
2	26	4	4800	20	4	2	4	3	4	2	4	3	4	54	4	3	4	2	4	4	2	4	3	2	1	2	1	0	1	1	0	1	2	2	3	2	2	1	3	2	0	2	1	0	0	1	0	2	1
1	34	5	5000	20	4	3	4	3	4	3	4	3	2	50	4	2	3	3	2	2	3	2	3	0	0	0	0	1	1	2	0	1	1	2	3	3	2	3	1	2	2	1	0	1	1	1	0	1	0
1	21	4	1000	10	3	2	2	3	3	2	3	4	2	50	3	4	2	3	4	4	5	4	4	1	2	2	1	2	3	2	1	2	2	2	3	3	2	2	2	3	2	3	2	2	1	2	2	2	2
1	18	3	2000	5	4	4	4	4	4	4	4	4	4	50	4	4	4	4	4	4	4	4	4	1	1	1	1	1	1	1	1	1	3	2	2	3	3	3	2	2	1	1	1	1	1	1	1	1	1
1	24	5	5000	8	3	2	2	1	2	1	2	3	1	50	3	2	2	3	4	1	4	2	1	0	0	1	0	2	1	1	0	2	2	1	1	2	2	1	2	2	0	1	0	1	0	0	0	1	0
2	43	3	5000	14	3	1	3	3	1	1	3	1	1	50	5	4	5	5	5	5	1	5	5	3	3	0	0	0	0	0	0	0	1	1	1	1	1	1	1	1	1	0	1	1	1	1	1	0	1
1	27	4	7500	10	4	2	2	1	2	1	2	2	1	50	3	2	2	1	1	2	3	1	2	1	1	0	1	0	1	0	1	1	2	2	2	2	2	3	2	3	1	0	1	1	0	0	0	1	1
1	34	4	8500	4	4	2	5	2	2	2	1	1	1	50	4	4	5	4	4	5	4	4	4	0	0	0	0	0	0	0	0	0	1	1	1	1	1	1	1	3	1	1	1	0	0	0	1	1	1
1	20	3	15009	46	4	3	3	3	3	3	4	4	3	45	4	3	3	4	4	4	3	4	3	1	1	1	2	2	2	2	2	2	3	2	2	3	3	3	2	2	1	1	2	1	2	2	2	1	1
1	35	2	4577	2	5	3	3	4	4	2	4	3	3	33	5	3	2	2	3	3	4	2	4	2	1	1	1	2	1	1	2	2	1	3	3	4	2	3	2	4	3	1	3	1	2	2	1	3	2
1	25	4	10000	10	3	4	3	4	4	3	3	4	4	30	4	5	4	3	4	5	4	4	5	3	2	3	2	2	1	2	2	2	2	3	2	1	2	3	3	3	2	1	2	2	2	1	2	2	1
2	26	2	2000	3	3	3	2	3	3	3	2	3	3	30	3	2	2	2	2	3	3	2	2	1	1	1	1	1	1	1	1	2	2	2	2	3	2	2	3	2	2	2	1	1	2	1	2	1	1
1	26	4	5000	30	4	2	3	4	2	4	3	4	1	30	4	2	4	1	4	5	5	2	4	0	0	1	0	0	0	3	0	0	2	2	1	1	1	1	1	1	0	1	1	0	1	1	1	1	0
1	21	4	2500	10	3	2	3	2	1	1	1	3	1	30	1	1	1	1	1	1	3	1	1	0	0	0	0	0	0	0	0	0	1	1	3	2	1	2	1	3	1	1	1	1	0	0	0	1	1
2	20	4	10000	10	3	1	3	2	1	1	1	1	1	30	2	2	1	1	1	1	1	1	1	0	0	0	0	0	0	0	0	0	1	1	1	1	1	1	1	1	0	0	0	0	0	0	0	0	0
1	22	4	5000	2	2	2	2	4	3	2	1	1	1	20	1	1	1	2	1	2	2	1	1	1	1	2	0	0	1	1	0	0	1	1	1	2	1	1	2	2	1	1	2	0	1	0	0	0	0
1	28	4	12000	5	3	2	3	1	1	2	1	3	1	20	2	1	1	2	1	2	3	1	1	1	1	0	0	2	3	1	0	2	2	1	2	2	1	2	1	2	1	0	1	1	0	1	0	0	1
1	22	4	5000	16	3	4	3	3	5	4	3	4	4	18	4	4	5	3	4	4	5	2	4	1	2	1	0	0	0	0	0	0	1	1	2	1	2	3	1	3	3	2	2	1	1	1	0	1	1
1	25	4	8000	8	3	4	3	1	1	1	1	1	1	15	2	1	1	5	2	1	4	1	1	0	0	0	0	0	0	0	0	0	1	1	1	1	1	1	1	1	0	0	0	0	0	0	0	0	0
1	23	4	300	5	5	4	5	4	4	5	2	5	4	10	5	4	5	4	5	5	4	5	4	0	3	3	2	3	2	2	2	3	1	3	4	2	1	2	4	4	3	2	3	2	3	2	3	1	2
1	21	4	1500	15	5	2	3	1	1	2	3	4	1	10	5	4	4	4	5	4	5	1	2	0	0	0	0	2	1	2	0	3	1	1	2	1	1	1	2	2	0	1	1	1	0	0	0	0	1
1	23	5	8000	20	4	3	4	5	4	3	4	4	3	10	4	3	4	3	4	3	4	4	3	2	1	2	1	2	1	1	2	1	2	2	3	3	3	2	2	3	1	1	2	1	1	2	2	2	1
2	25	4	5500	15	3	2	4	2	4	3	2	4	3	5	4	3	4	2	4	4	4	3	4	0	1	1	0	0	1	0	0	0	2	2	3	1	2	2	2	2	1	0	1	0	0	1	0	1	2
1	22	4	1000	30	4	2	2	1	4	1	1	3	1	0	3	2	4	4	4	4	4	4	2	0	0	0	0	0	0	0	0	0	2	2	2	3	2	2	1	1	0	0	0	0	0	0	0	0	0
2	25	4	3500	30	5	4	4	4	5	4	3	5	4	0	5	4	4	5	5	5	4	5	4	2	2	3	2	3	2	2	3	2	2	1	1	4	1	1	1	1	0	0	2	0	0	0	0	0	0
1	18	4	2000	20	2	1	3	1	2	1	1	1	1	0	1	4	1	1	4	1	1	1	1	0	0	0	0	0	0	0	0	0	1	2	1	2	2	2	1	2	0	0	0	0	0	0	0	1	0
[truncated: 7 more columns]
